# Supplementary material for: Polymer-Decorated Cellulose Nanocrystals as Environmentally Friendly Additives for Olefin-Based Drilling Fluids
Source: MDPI journal article supplement (doi:10.3390/ijms22010352), 2020-12-31
Supplement: s1 [file s1]

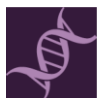

Supplementary Material

## Polymer-decorated cellulose nanocrystals as environmentally friendly additives for olefin-based drilling fluids

José Aurélio Pinheiro<sup>1</sup>, Nívia do Nascimento Marques<sup>1</sup>, Marcos Antônio Villetti<sup>2</sup> and Rosângela de Carvalho Balaban<sup>1\*</sup>

<sup>1</sup> Laboratório de Pesquisa em Petróleo, Universidade Federal do Rio Grande do Norte, Natal-RN, 59078-970, Brazil; joseaureliopinheiro@gmail.com (J. A. P.); nivianmarques@hotmail.com (N. N. M.)

<sup>2</sup> Universidade Federal de Santa Maria, Santa Maria-RS, 97105900, Brazil; mvilletti@hotmail.com

\* Correspondence: rosangelabalaban@hotmail.com; Tel.: +55-84-3342-2323

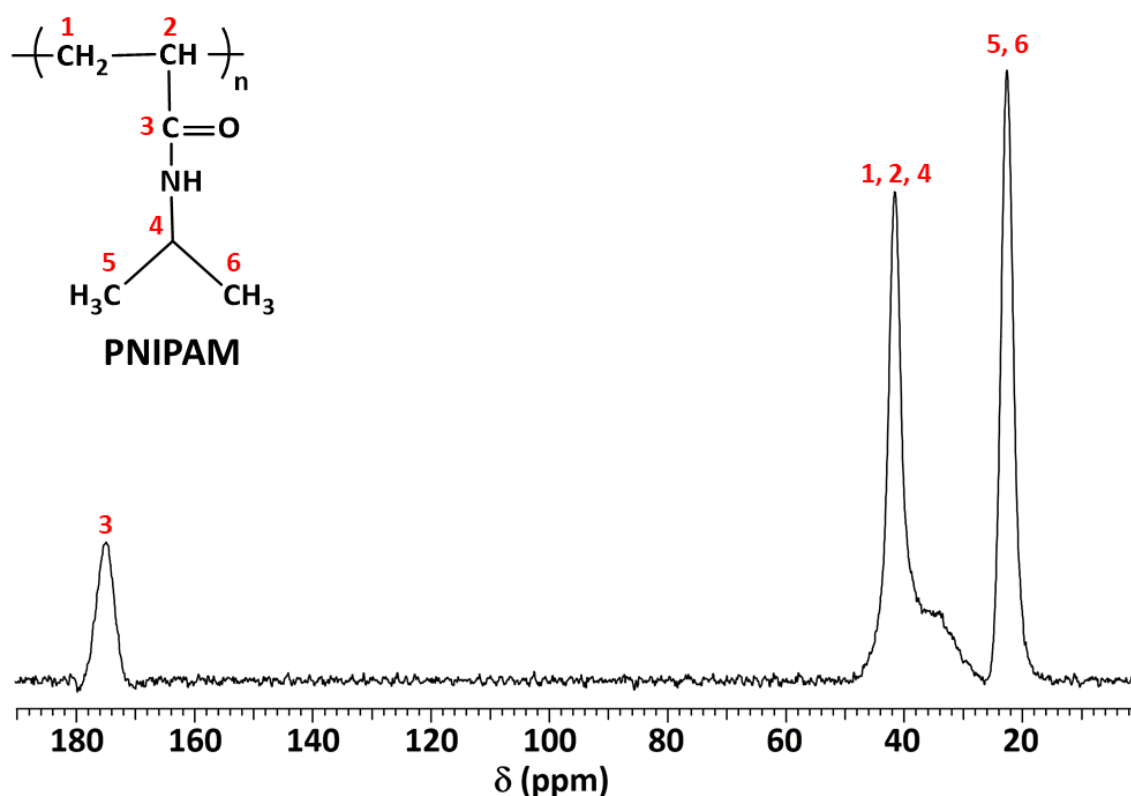

Figure S1. <sup>13</sup>C NMR spectrum of PNIPAM.

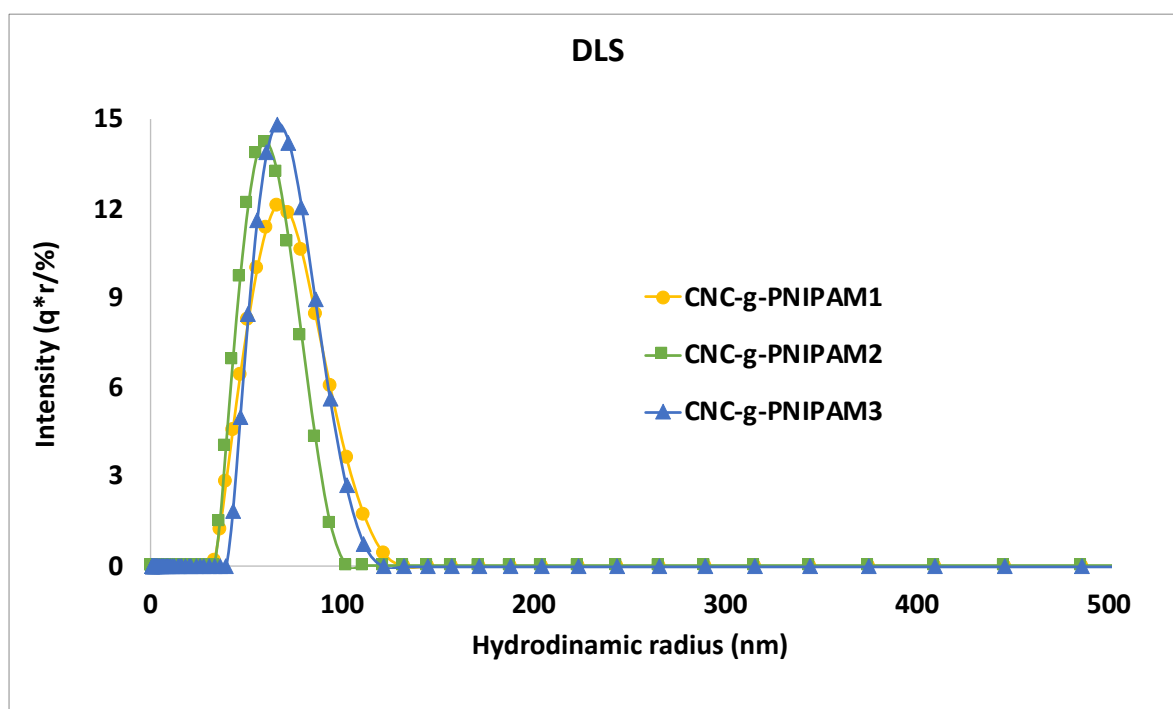

**Figure S2.** Hydrodynamic radius of the CNC-g-PNIPAM1, CNC-g-PNIPAM2 and CNC-g-PNIPAM3 copolymers in water after filtration with 0.45  $\mu\text{m}$  pore size cellulose acetate Millipore membranes.

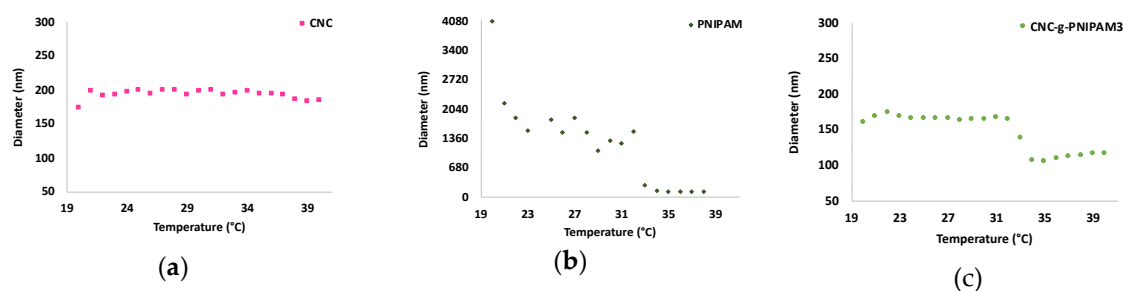

**Figure S3.** Hydrodynamic diameter of (a) CNC, (b) PNIPAM and (c) CNC-g-PNIPAM3 as a function of temperature, without filtration. As expected, CNC did not exhibit a thermosensitive behavior in water and the transmittance remained constant throughout the heating process. PNIPAM exhibited a large mean size, probably due to intermolecular associations, which abruptly decreases with heating, due to breakage of polymer-water and polymer-polymer intermolecular hydrogen bonds and increase of polymer-polymer intramolecular interactions when temperature reaches 32 °C. CNC-g-PNIPAM3 presented a much smaller size when compared to PNIPAM, but the thermosensitive behavior can still be observed by heating, as they exhibited a smaller size with the increase in temperature from 33 °C, due to the contraction of the PNIPAM chains decorating the cellulose nanocrystals.
